# Supplementary material for: Decadal changes in global surface NO x emissions from multi-constituent satellite data assimilation
Source: Copernicus journal article supplement (doi:10.5194/acp-2016-529), 2016-06-27
Supplement: Supplementary file 1 [file acp-2016-529-supplement.pdf]

Supplementary material for the manuscript “Decadal changes in global surface NO<sub>x</sub> emissions from multi-constituent satellite data assimilation” by K. Miyazaki et al.

Table S1: Model minus observation comparisons of the mean O<sub>3</sub> concentrations between the MIROC simulations and TES ver. 6 special observations during 2011-2014. The results are shown for MIROC simulations using the optimized surface NO<sub>x</sub> emissions and the a priori surface NO<sub>x</sub> emissions (in brackets)

| Location      | Bias [ppb]   | RMSE [ppb]  |
|---------------|--------------|-------------|
| Fort MacKay   | -5.3 (-5.6)  | 7.1 (7.6)   |
| Paris         | -7.8 (-8.7)  | 9.7 (10.4)  |
| Trinidad Head | -5.1 (-5.7)  | 6.8 (7.3)   |
| New York      | -8.1 (-8.9)  | 13.8 (14.2) |
| Istanbul      | -8.2 (-9.7)  | 10.1 (11.8) |
| Beijing       | -7.0 (-8.9)  | 8.5 (10.1)  |
| Seoul         | -4.3 (-5.2)  | 6.5 (7.2)   |
| Tokyo         | -5.4 (-6.4)  | 8.5 (9.3)   |
| Los Angeles   | -9.5 (-12.2) | 11.7 (14.0) |
| Houston       | -0.6 (-2.4)  | 5.2 (5.7)   |
| Mexico city   | -4.4 (-6.3)  | 4.9 (7.3)   |
| Shenzhen      | 0.2 (-1.0)   | 4.6 (5.1)   |
| Mumbai        | 0.8 (-1.7)   | 7.8 (8.1)   |
| Bangkok       | 1.6 (-0.6)   | 6.8 (6.4)   |
| Lagos         | -1.7 (-3.8)  | 4.1 (5.5)   |
| Sao Paulo     | -0.1 (-1.5)  | 3.3 (3.2)   |

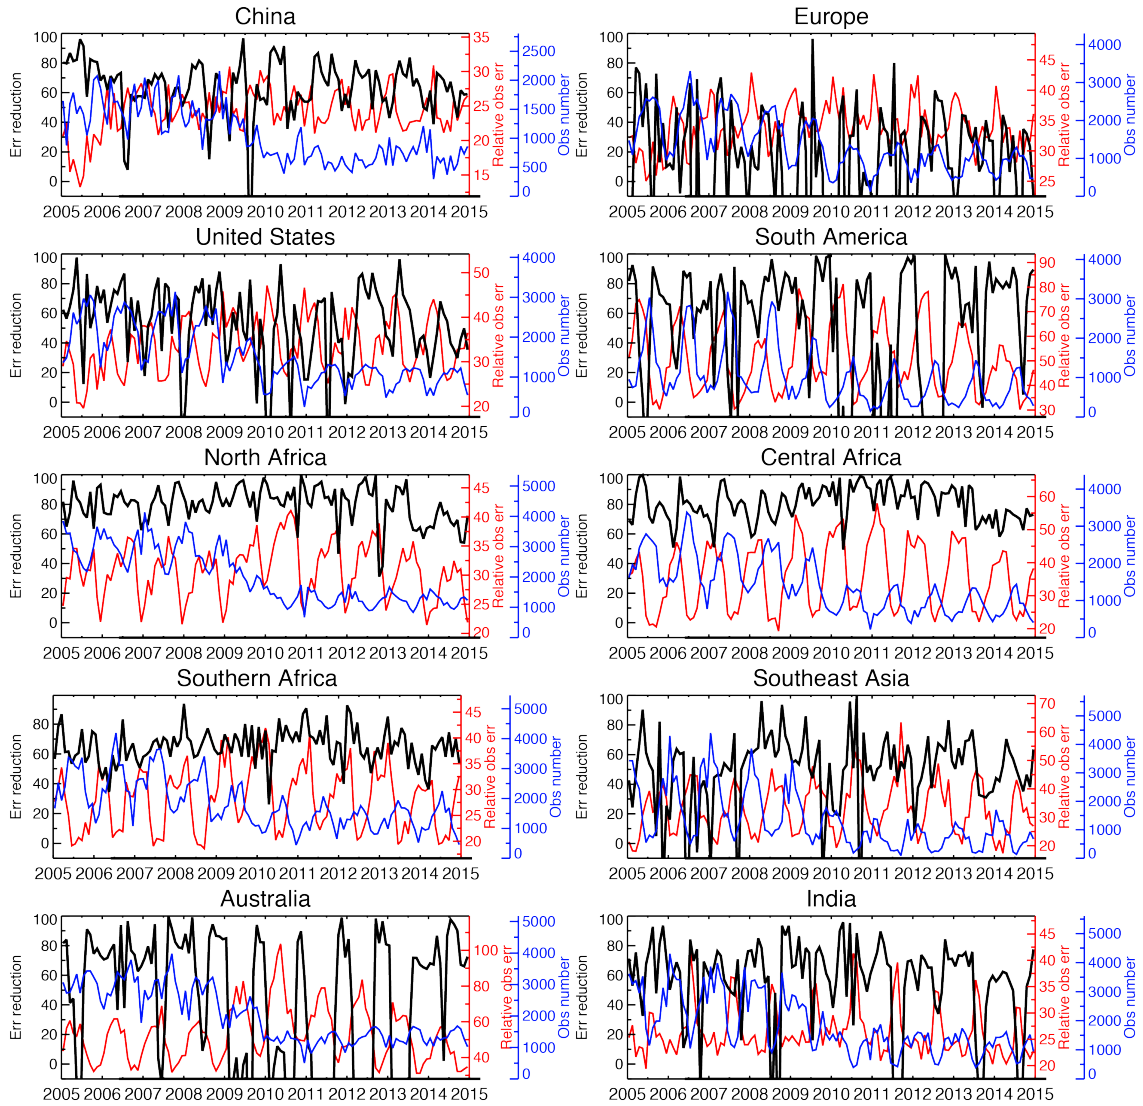

Figure S1a: Time series of the monthly and regional mean error reduction of tropospheric NO<sub>2</sub> column by data assimilation (black line, in %), relative observation error (red line in %), and the mean number of observations (blue line, per month per super observation grid) for OMI. The relative error was estimated by dividing the mean observation error by the mean observation concentration for each super-observation.

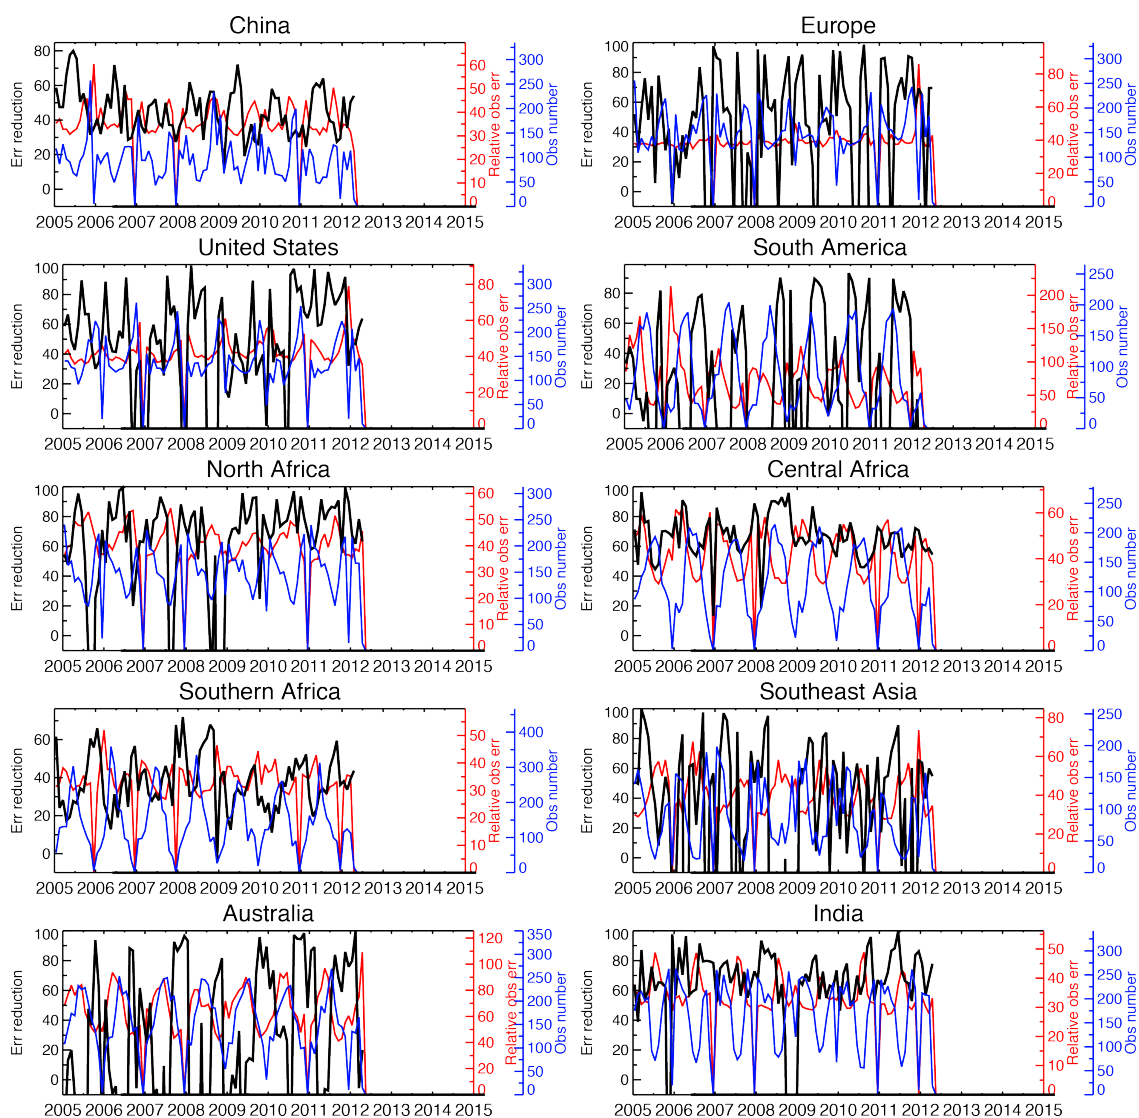

Figure S1b: Same as in Fig. S1a, but for SCIAMACHY.

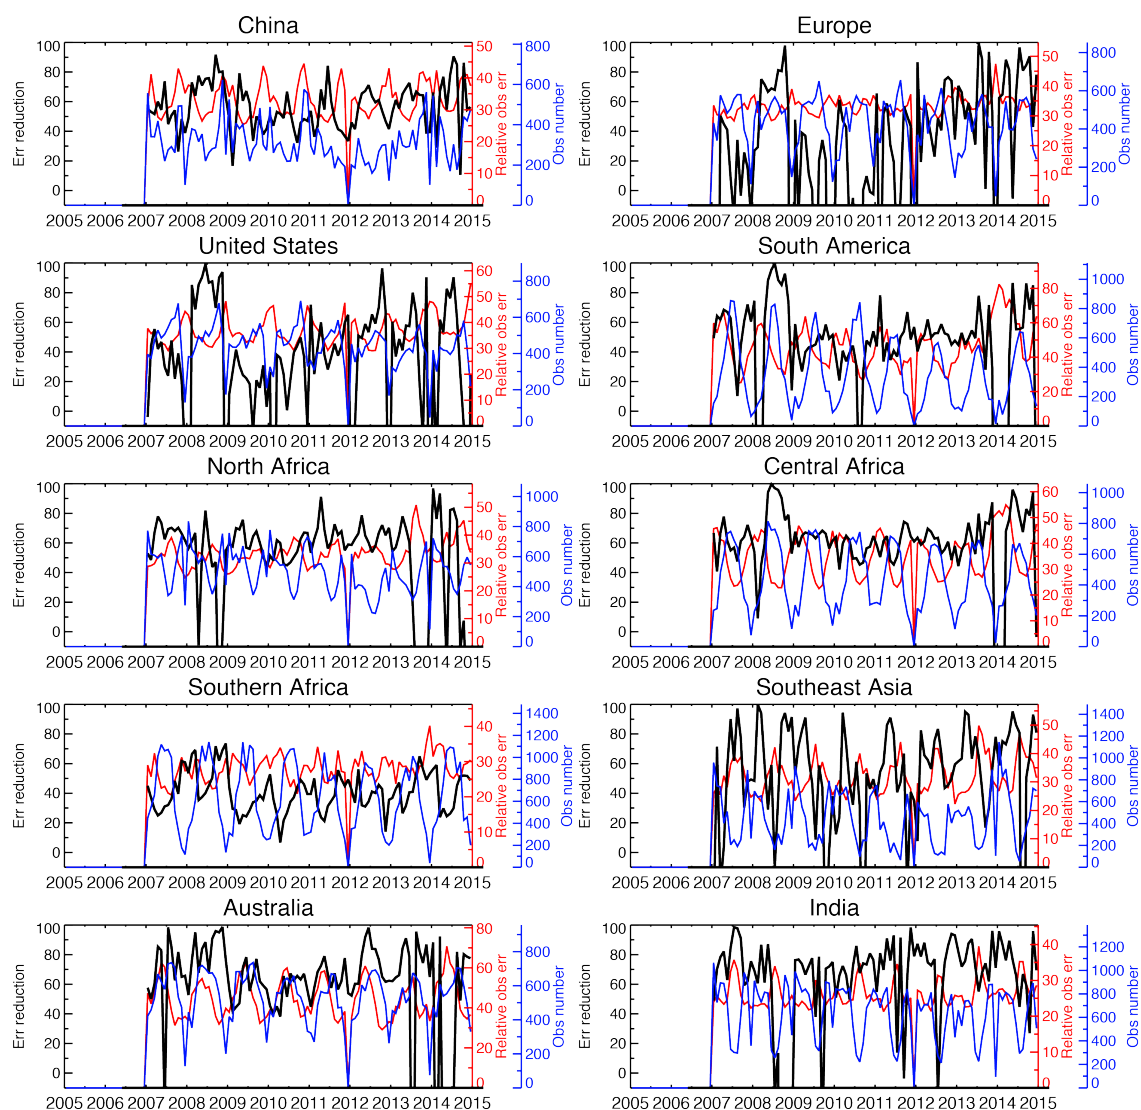

Figure S1c: Same as in Fig. S1a, but for GOME-2.
